# Supplementary figures and images for: Comparison of Growth Performance and Meat Quality Traits of Commercial Cross-Bred Pigs versus the Large Black Pig Breed
Source: MDPI journal article supplement (doi:10.3390/ani11010200), 2021-01-15

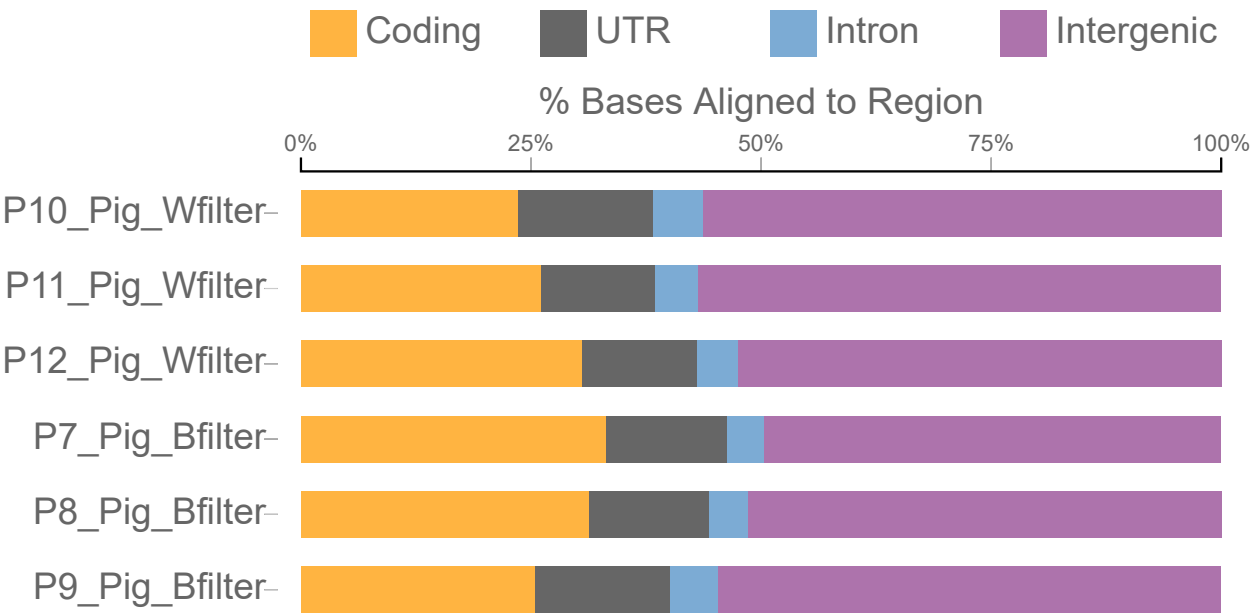

Supplement: s1 [file s1]
